# Supplementary material for: Ochracenoids A and B, Guaiazulene-Based Analogues from Gorgonian Anthogorgia ochracea Collected from the South China Sea
Source: PubMed Central journal article supplement (PMC3967227; doi:10.3390/md12031569), 2014-03-14
Supplement: marinedrugs-12-01569-s001.pdf [file marinedrugs-12-01569-s001.pdf]

# Supplementary Information

## Table of Content

### **S1. 1D and 2D NMR and MS Spectra for Compounds 1 and 2**

**Figure S1.**  $^1\text{H}$  NMR spectrum (600 MHz,  $\text{CDCl}_3$ ) of compound **1**.

**Figure S2.**  $^{13}\text{C}$  NMR spectrum (150 MHz,  $\text{CDCl}_3$ ) of compound **1**.

**Figure S3.** HMQC spectrum of compound **1** in  $\text{CDCl}_3$ .

**Figure S4.** HMBC spectrum of compound **1** in  $\text{CDCl}_3$ .

**Figure S5.**  $^1\text{H}$ - $^1\text{H}$  COSY spectrum of compound **1** in  $\text{CDCl}_3$ .

**Figure S6.** ESIMS spectrum of compound **1**.

**Figure S7.** HRESIMS spectrum of compound **1**.

**Figure S8.**  $^1\text{H}$  NMR spectrum (500 MHz,  $\text{CDCl}_3$ ) of compound **2**.

**Figure S9.**  $^{13}\text{C}$  NMR spectrum (125 MHz,  $\text{CDCl}_3$ ) of compound **2**.

**Figure S10.** HMQC spectrum of compound **2** in  $\text{CDCl}_3$ .

**Figure S11.** HMBC spectrum of compound **2** in  $\text{CDCl}_3$ .

**Figure S12.**  $^1\text{H}$ - $^1\text{H}$  COSY spectrum of compound **2** in  $\text{CDCl}_3$ .

**Figure S13.** ESIMS spectrum of compound **2**.

**Figure S14.** HRESIMS spectrum of compound **2**.

### **S2. ECD Simulation of Compound 1**

**Table S1.** Calculation ECD data for the lowest energy conformer.

## S1. 1D and 2D NMR and MS Spectra for Compounds 1 and 2

Figure S1.  $^1\text{H}$  NMR spectrum (600 MHz,  $\text{CDCl}_3$ ) of compound 1.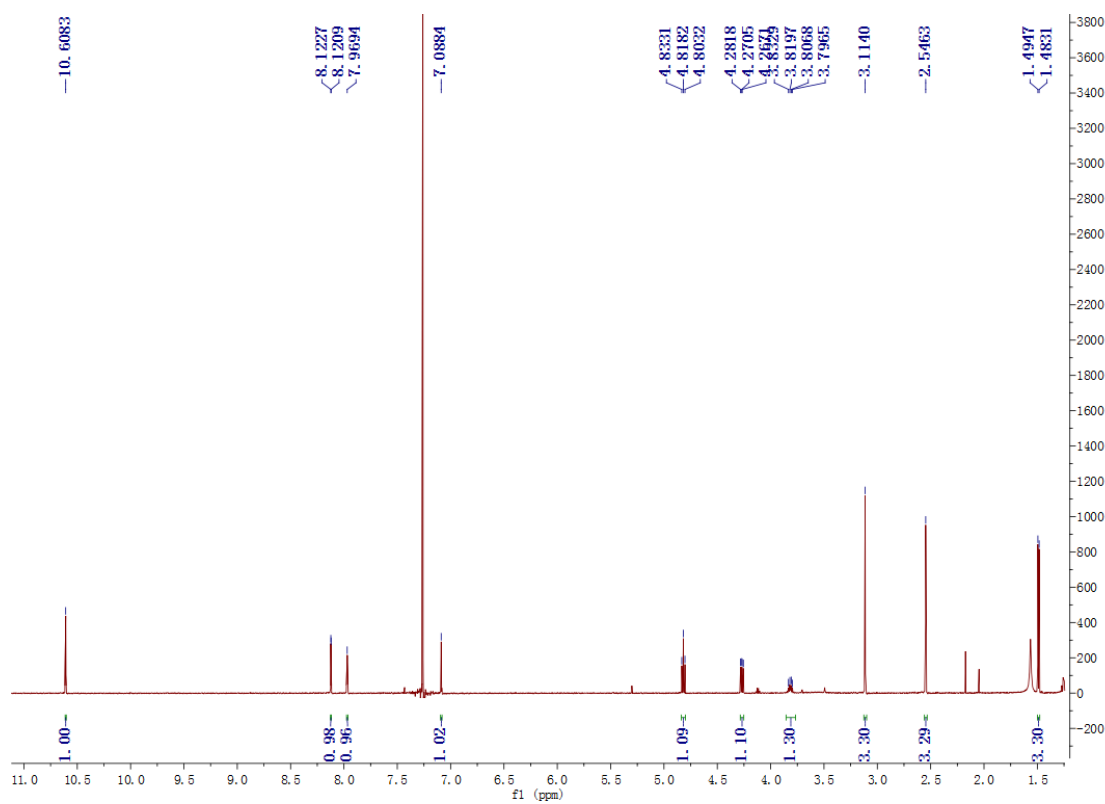Figure S2.  $^{13}\text{C}$  NMR spectrum (150 MHz,  $\text{CDCl}_3$ ) of compound 1.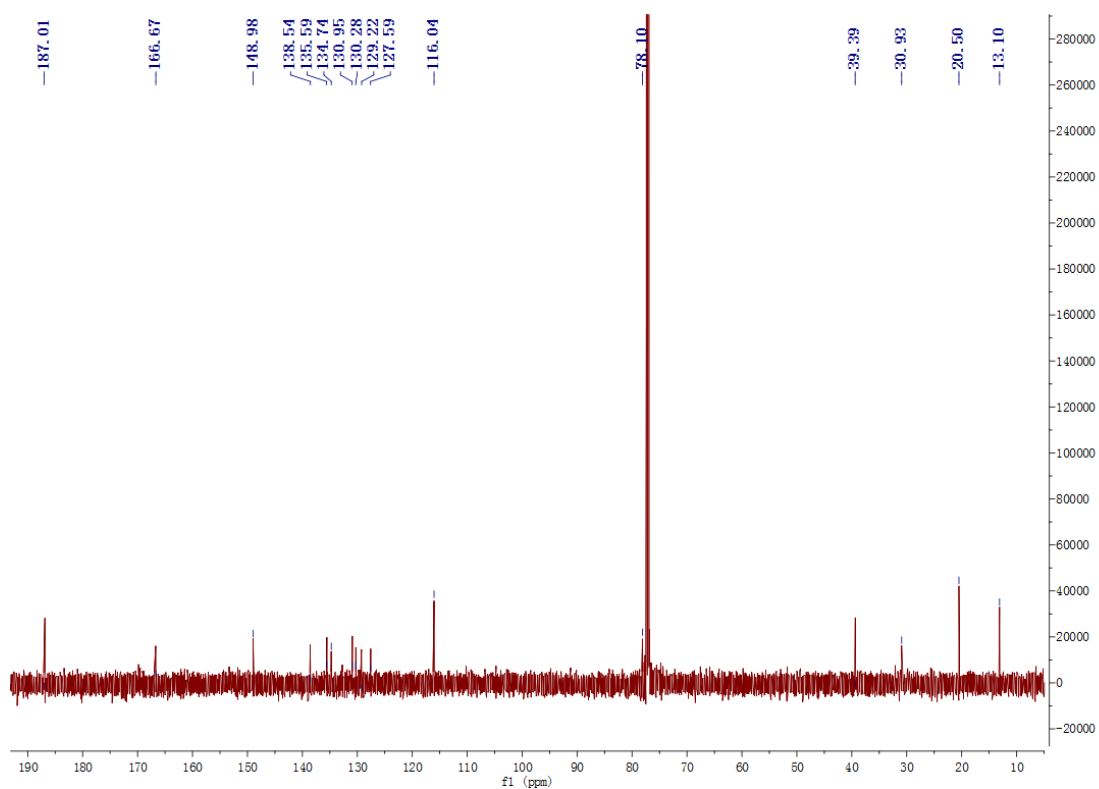

**Figure S3.** HMQC spectrum of compound 1 in CDCl<sub>3</sub>.

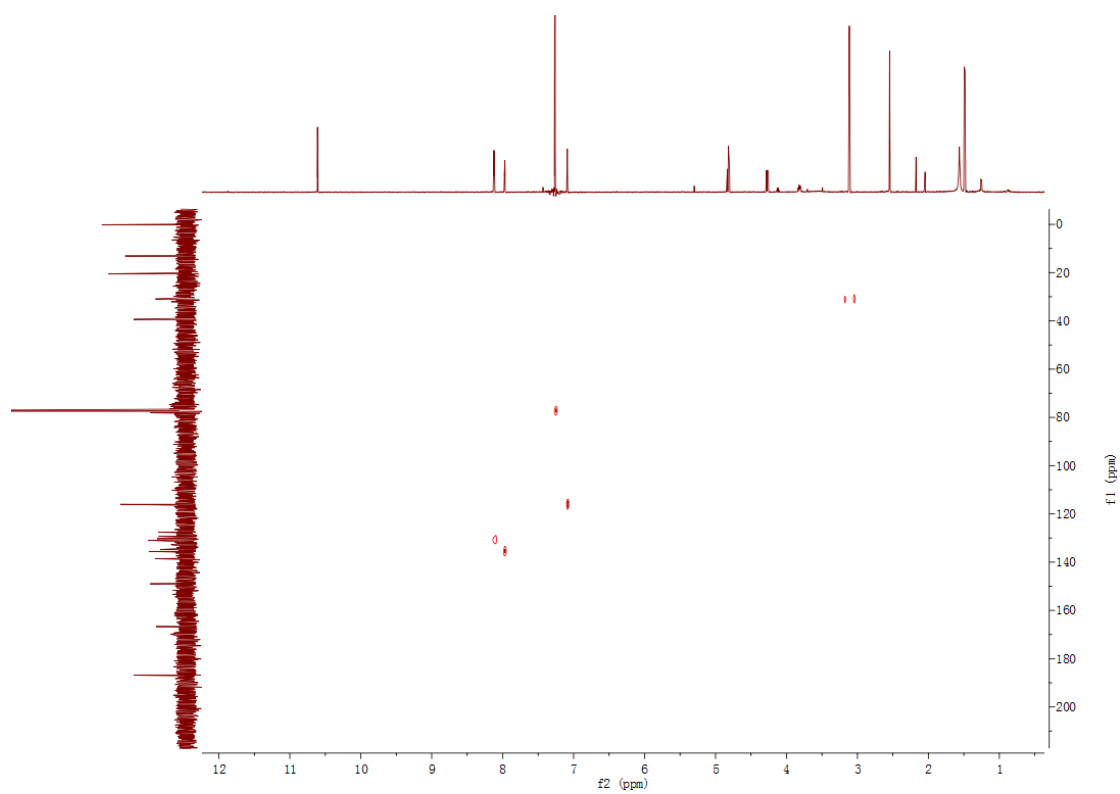

**Figure S4.** HMBC spectrum of compound 1 in CDCl<sub>3</sub>.

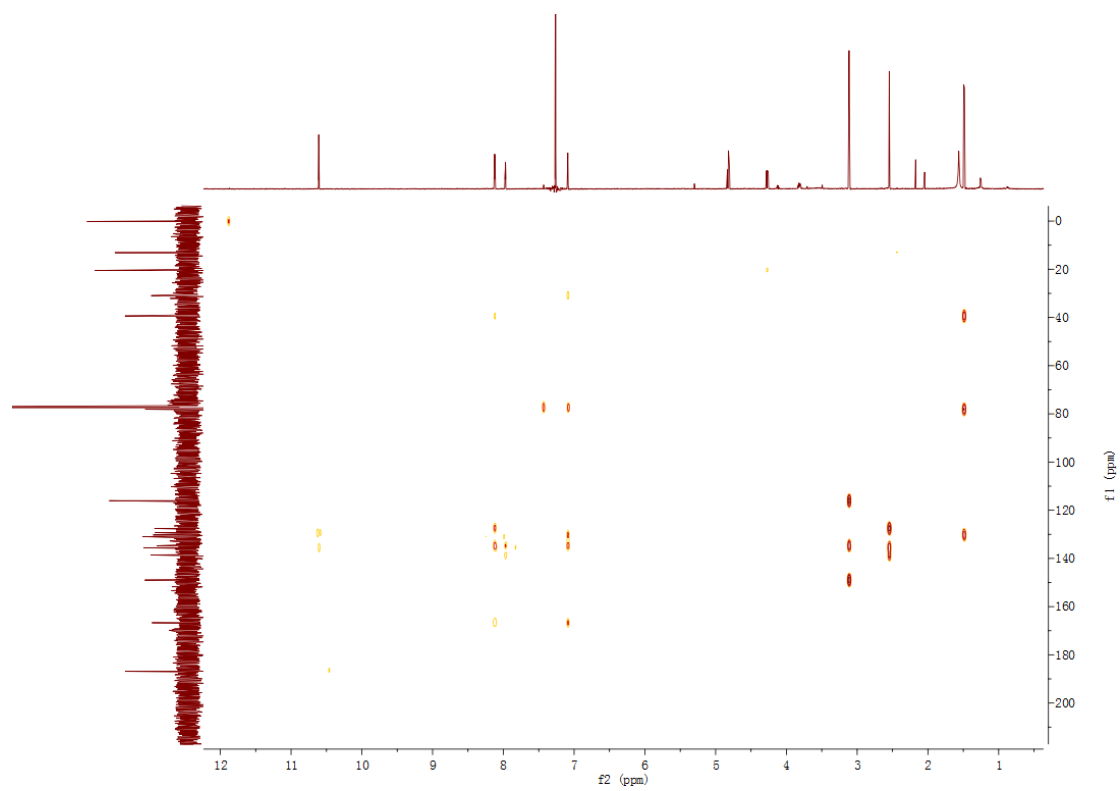

Figure S5.  $^1\text{H}$ - $^1\text{H}$  COSY spectrum of compound 1 in  $\text{CDCl}_3$ .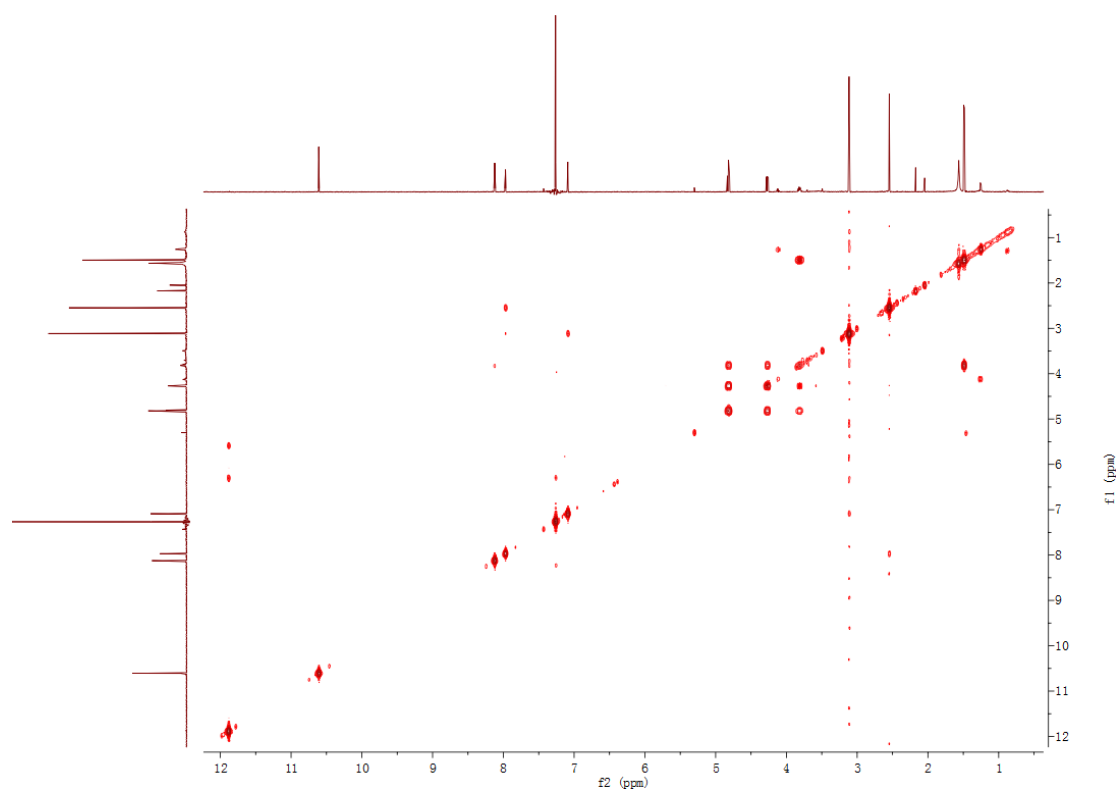

Figure S6. ESIMS spectrum of compound 1.

## Display Report

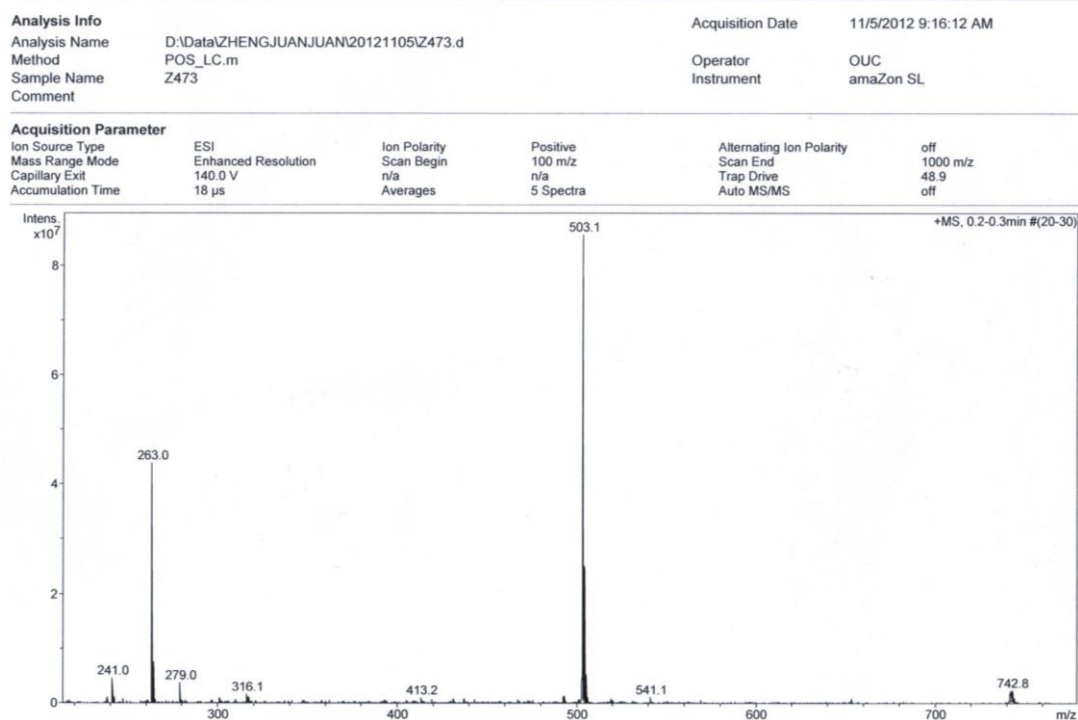

Figure S7. HRESIMS spectrum of compound 1.

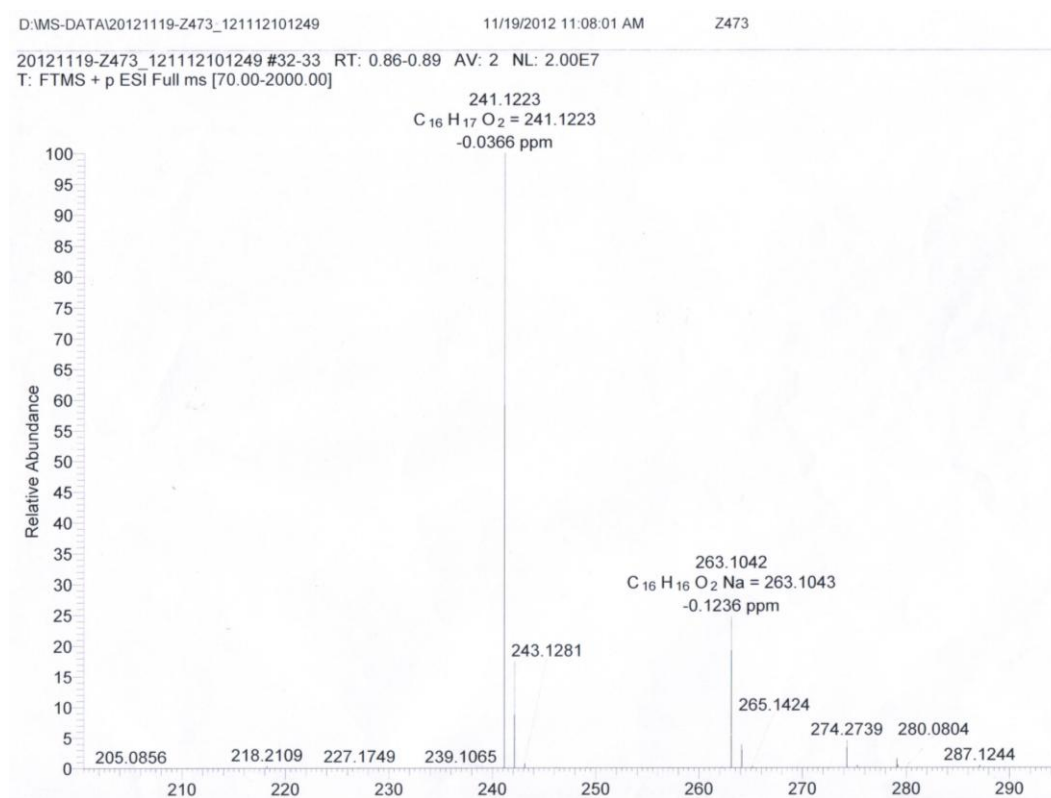Figure S8. <sup>1</sup>H NMR spectrum (500 MHz, CDCl<sub>3</sub>) of compound 2.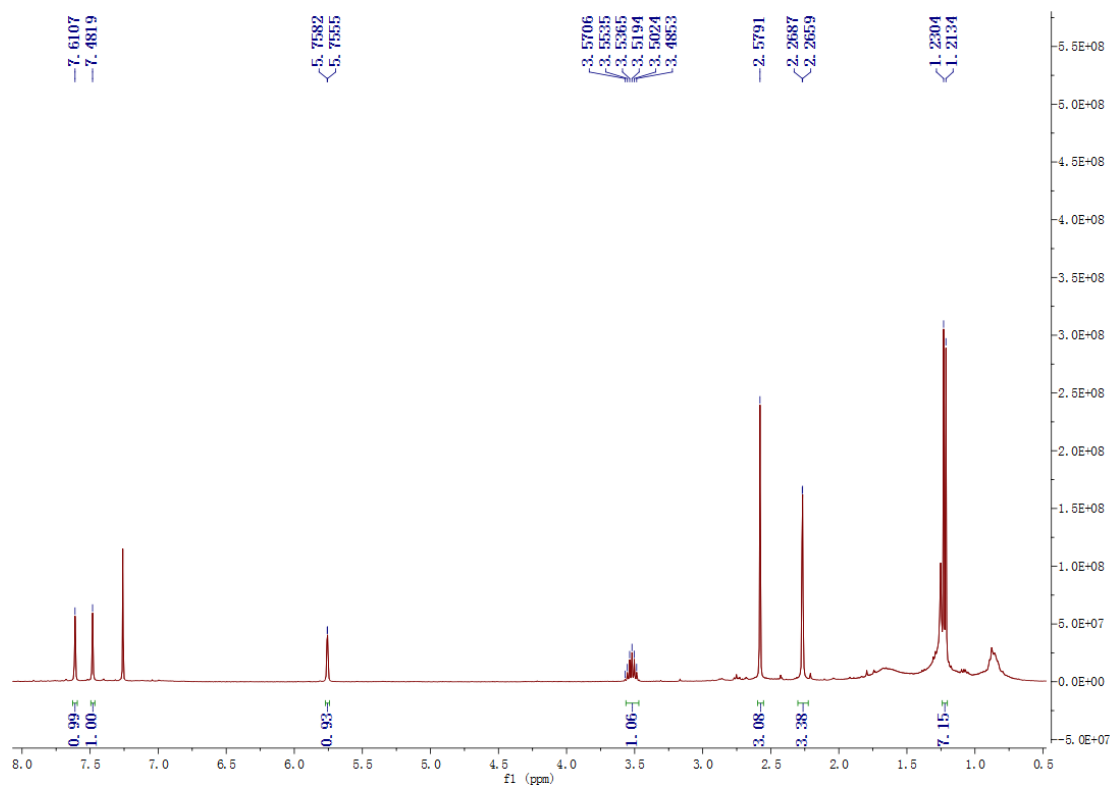

**Figure S9.**  $^{13}\text{C}$  NMR spectrum (125 MHz,  $\text{CDCl}_3$ ) of compound **2**.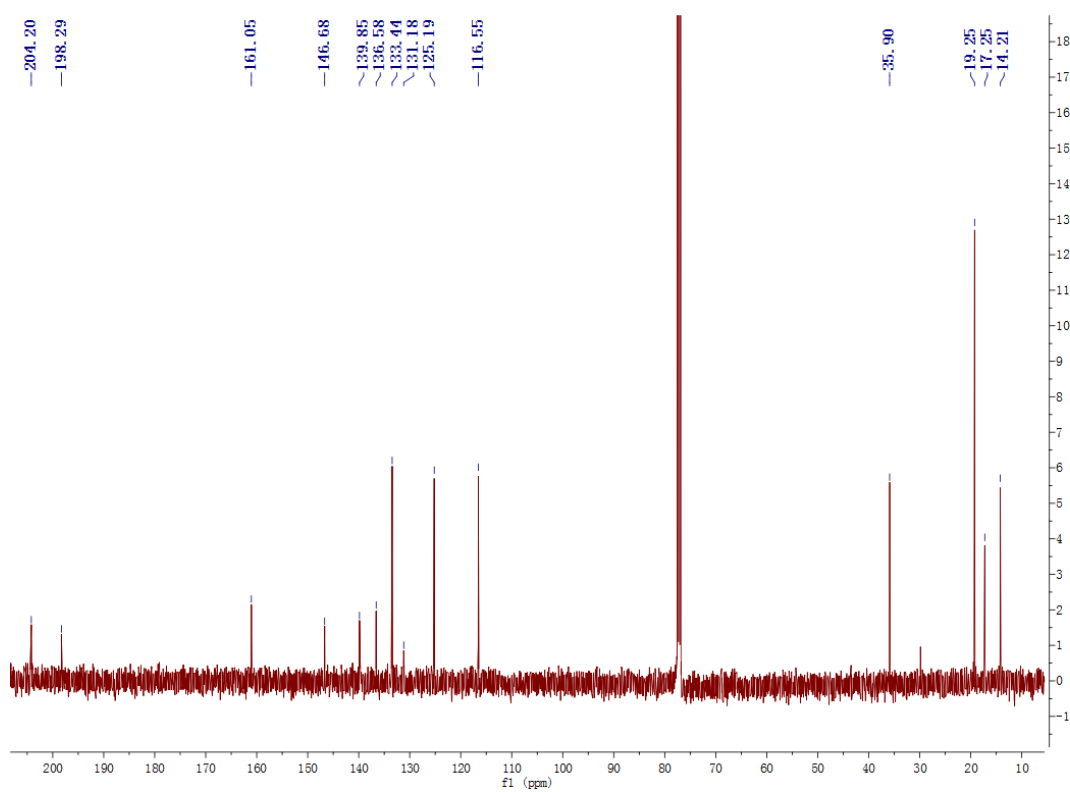**Figure S10.** HMQC spectrum of compound **2** in  $\text{CDCl}_3$ .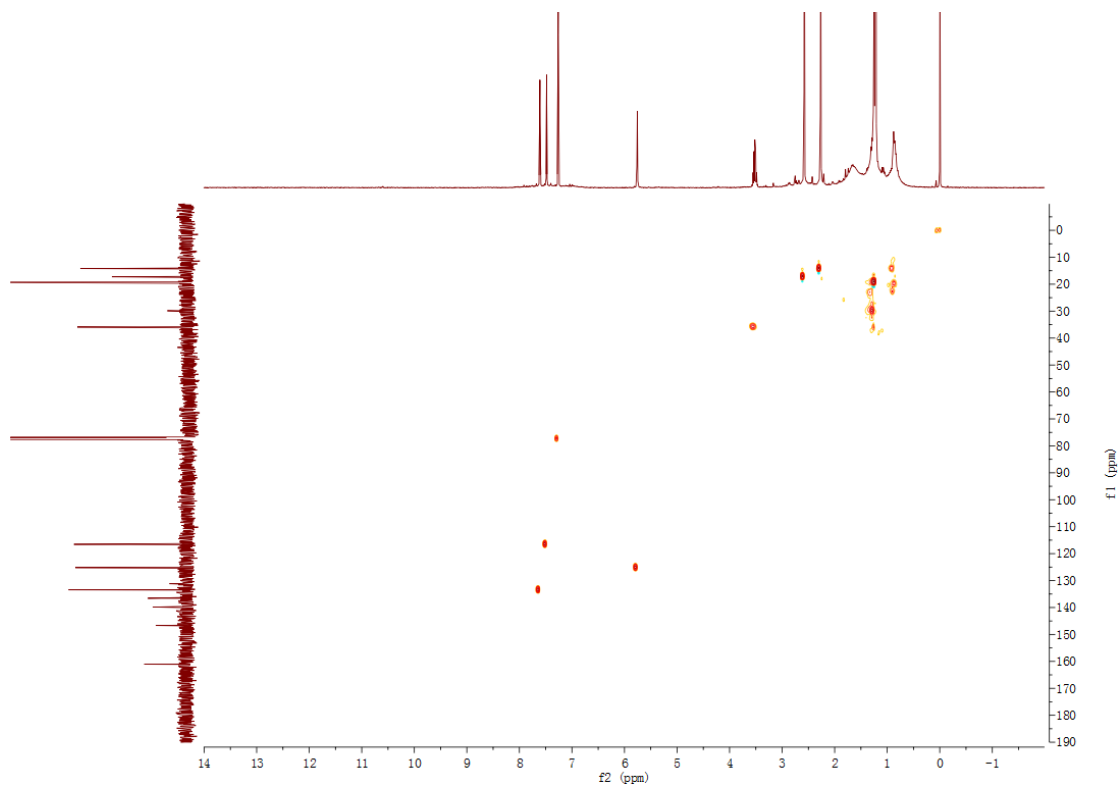

**Figure S11.** HMBC spectrum of compound **2** in CDCl<sub>3</sub>.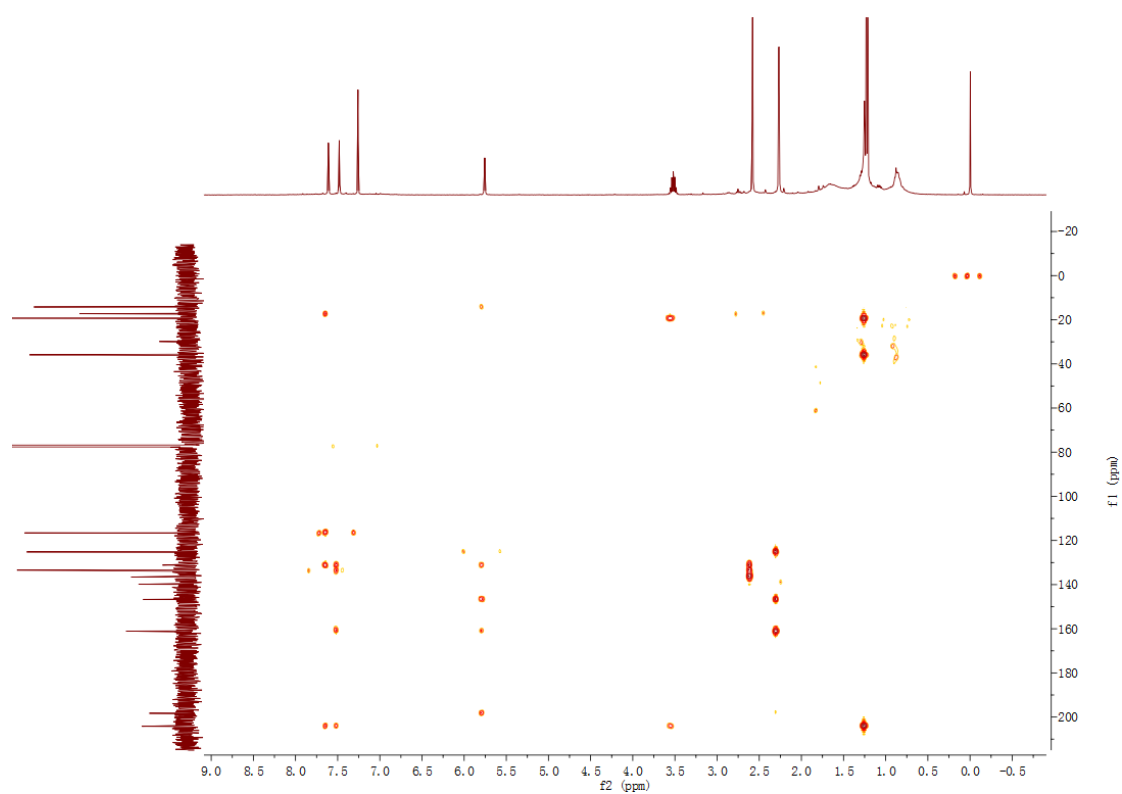**Figure S12.** <sup>1</sup>H-<sup>1</sup>H COSY spectrum of compound **2** in CDCl<sub>3</sub>.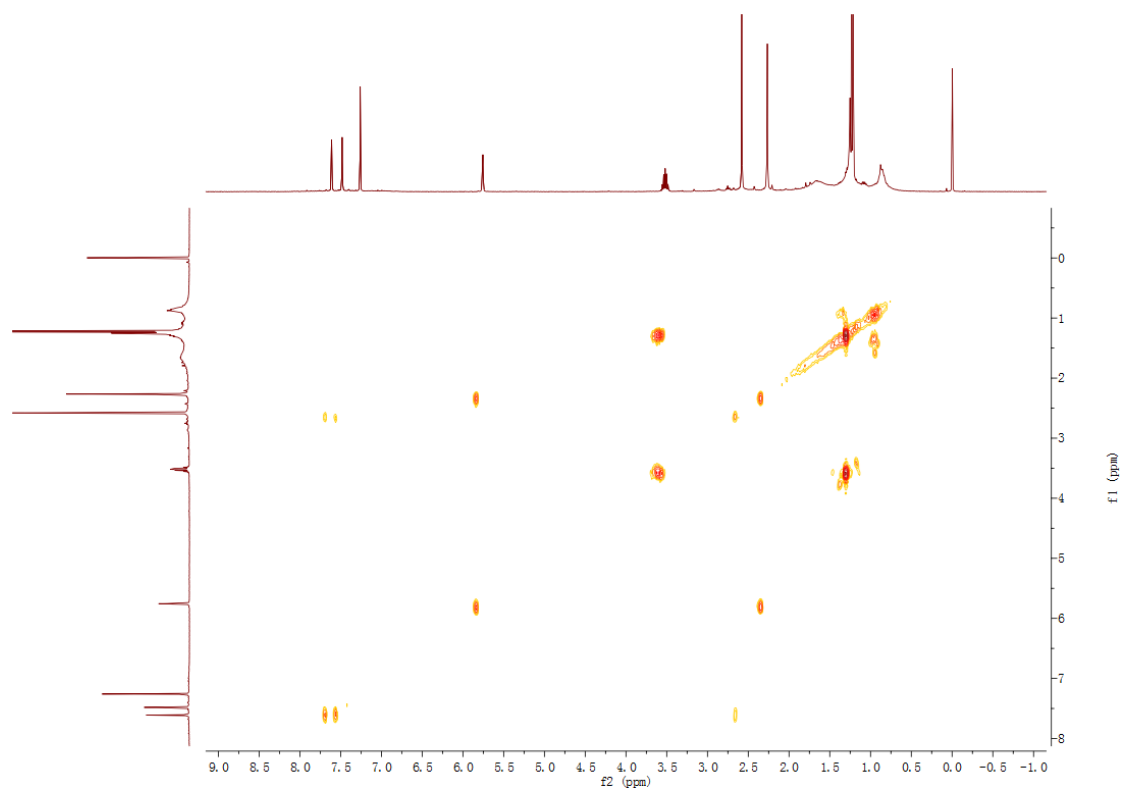

**Figure S13.** ESIMS spectrum of compound 2.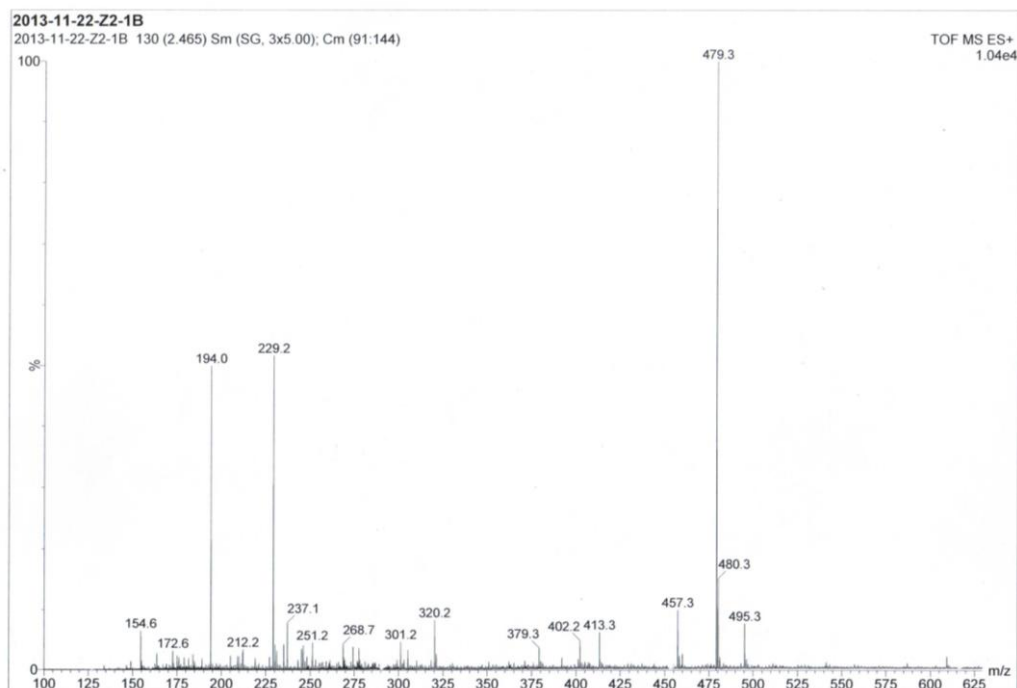**Figure S14.** HRESIMS spectrum of compound 2.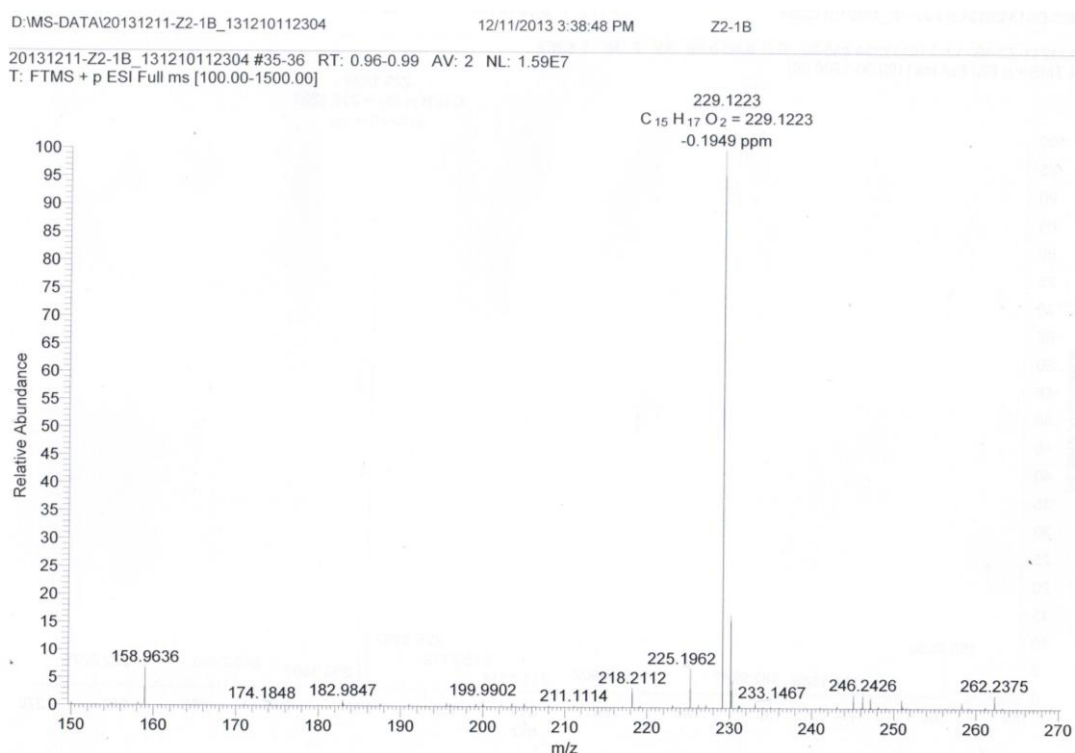

## S2. ECD Simulation of Compound 1

ECD spectrum of each conformation is simulated according to the overlapping Gaussian functions expressed as:



$$\Delta\varepsilon(E) = \frac{1}{2.296 \times 10^{-39} \sqrt{\pi} \sigma} \sum_i^A \Delta E_i R_i e^{[-(E - \Delta E_i)^2 / \sigma^2]}$$

where  $\sigma$  is half the bandwidth at 1/e peak height and expressed in energy units. The parameters  $\Delta E_i$  and  $R_i$  are the excitation energies and rotational strengths for the transition  $i$ , respectively.

The above function is converted to  $\Delta\varepsilon$ ,  $\lambda$  (wavelength) correlations as:

$$\Delta\varepsilon(\lambda) = \frac{1}{2.296 \times 10^{-39} \sqrt{\pi} \sigma} \sum_i^A \Delta E_i R_i e^{[-(1240/\lambda - \Delta E_i)^2 / \sigma^2]}$$

and then simulation were accomplished by using the Excel 2003 and the Origin 7.0 software. Velocity rotatory strengths were used for ECD curve simulation.

**Table S1.** Calculated ECD data for the lowest energy conformer.

| State | Excitation Energies (eV) | Wavelength (nm) | Rotatory Strengths * | State | Excitation Energies (eV) | Wavelength (nm) | Rotatory Strengths * |
|-------|--------------------------|-----------------|----------------------|-------|--------------------------|-----------------|----------------------|
| 1     | 2.5249                   | 491.04          | 0.9032               | 16    | 5.374                    | 230.71          | 0.9463               |
| 2     | 3.1719                   | 390.88          | -0.3886              | 17    | 5.4449                   | 227.71          | 11.6716              |
| 3     | 3.3081                   | 374.79          | -2.009               | 18    | 5.5202                   | 224.6           | -2.0132              |
| 4     | 3.6536                   | 339.35          | -3.9165              | 19    | 5.5364                   | 223.94          | -12.1664             |
| 5     | 3.6575                   | 338.99          | -2.3367              | 20    | 5.5656                   | 222.77          | 1.2979               |
| 6     | 4.1002                   | 302.39          | 20.9464              | 21    | 5.5783                   | 222.26          | 0.9404               |
| 7     | 4.5062                   | 275.14          | 1.7038               | 22    | 5.6291                   | 220.25          | -0.1661              |
| 8     | 4.9127                   | 252.37          | 3.6723               | 23    | 5.6671                   | 218.78          | 4.7842               |
| 9     | 4.9506                   | 250.44          | -16.3335             | 24    | 5.7234                   | 216.63          | 15.7885              |
| 10    | 4.9968                   | 248.13          | -20.8979             | 25    | 5.8068                   | 213.52          | -4.8249              |
| 11    | 5.0516                   | 245.43          | 0.4355               | 26    | 5.8404                   | 212.29          | 0.1877               |
| 12    | 5.0734                   | 244.38          | 2.4068               | 27    | 5.8575                   | 211.67          | 4.9851               |
| 13    | 5.192                    | 238.8           | 7.1343               | 28    | 5.8918                   | 210.43          | 16.7355              |
| 14    | 5.2298                   | 237.07          | 9.4053               | 29    | 5.9492                   | 208.4           | 3.1227               |
| 15    | 5.3204                   | 233.04          | -7.2738              | 30    | 6.0034                   | 206.52          | 0.3082               |

\*  $R(\text{velocity}) \times 10^{-40}$  erg-esu-cm.

© 2014 by the authors; licensee MDPI, Basel, Switzerland. This article is an open access article distributed under the terms and conditions of the Creative Commons Attribution license (<http://creativecommons.org/licenses/by/3.0/>).
